# Supplementary material for: Synthesis and structural studies of amido, hydrazido and imido zirconium(iv) complexes incorporating a diamido/diamine cyclam-based ligand
Source: Royal Society of Chemistry journal article supplement (doi:10.1039/b907335c), 2009-01-01
Supplement: b907335c.pdf [file b907335c.pdf]

**Synthesis and Structural Studies of Amido, Hydrazido  
and Imido Zr(IV) Complexes Incorporating a  
Diamido/Diamine Cyclam-Based Ligand**

Rui F. Munhá,<sup>a</sup> Luis F. Veiros,<sup>a</sup> Michael D. Fryzuk<sup>b</sup> and Ana M. Martins<sup>a\*</sup>

<sup>a</sup> *Centro de Química Estrutural, Instituto Superior Técnico, Av. Rovisco Pais No. 1, 1049-001 Lisboa, Portugal*

<sup>b</sup> *Department of Chemistry, The University of British Columbia, 2036 Main Mall, Vancouver, British Columbia, Canada, V6T 1Z1*

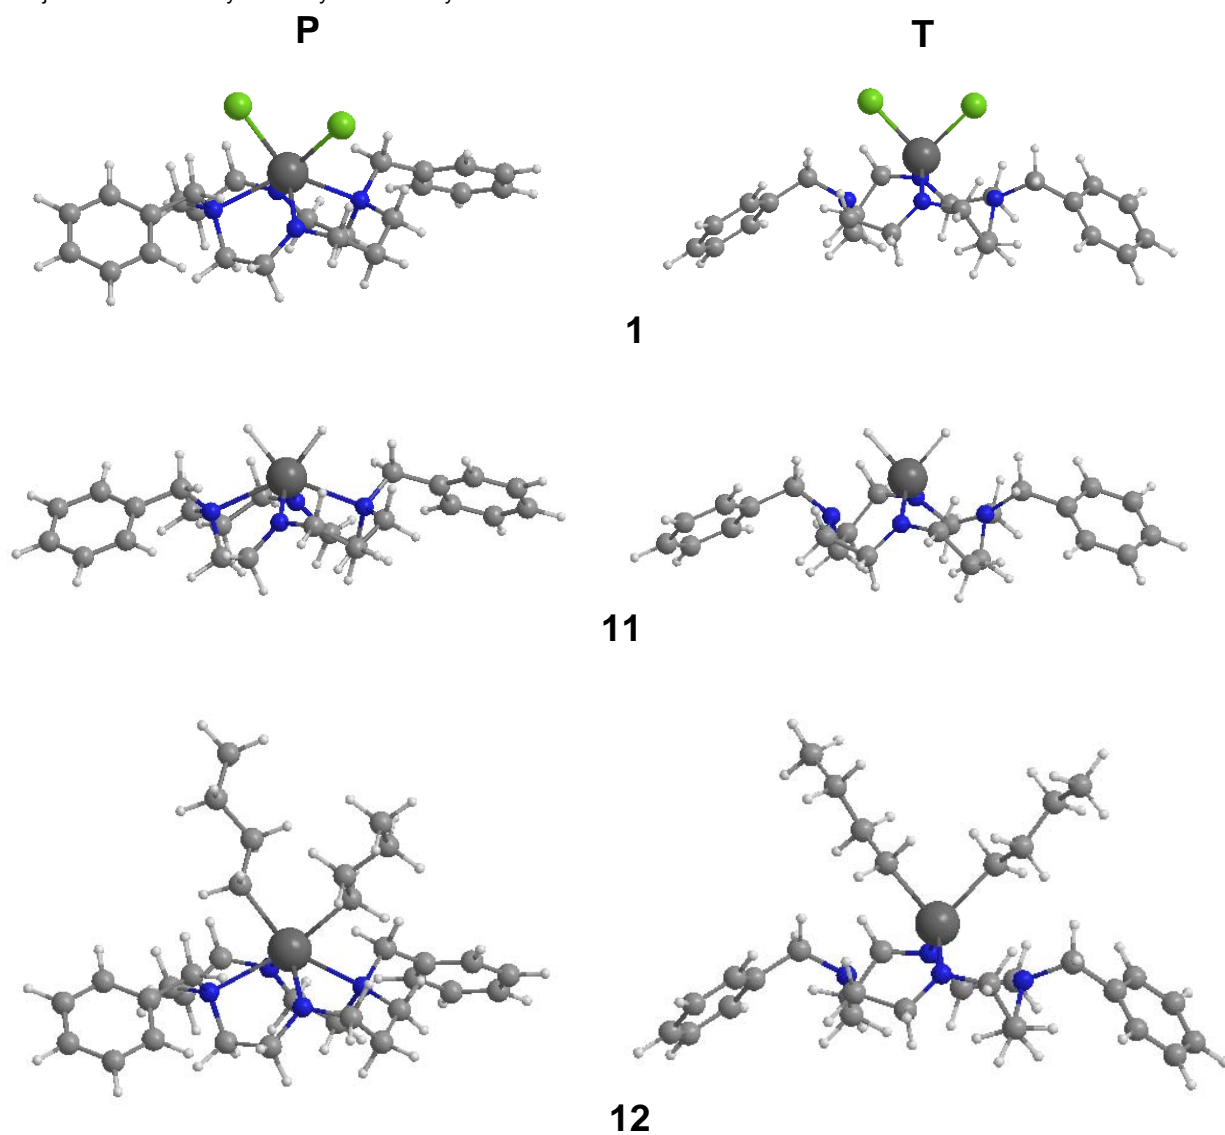

**Figure S1.** Optimized geometry for the **P** (left side) and the **T** (right side) isomers of the  $[(\text{Bn}_2\text{Cyclam})\text{ZrXY}]$  complexes with equal ancillary ligands.  $X = Y = \text{Cl}$  (**1**, top),  $X = Y = \text{H}$  (**11**, middle),  $X = Y = n\text{-Bu}$  (**12**, bottom).

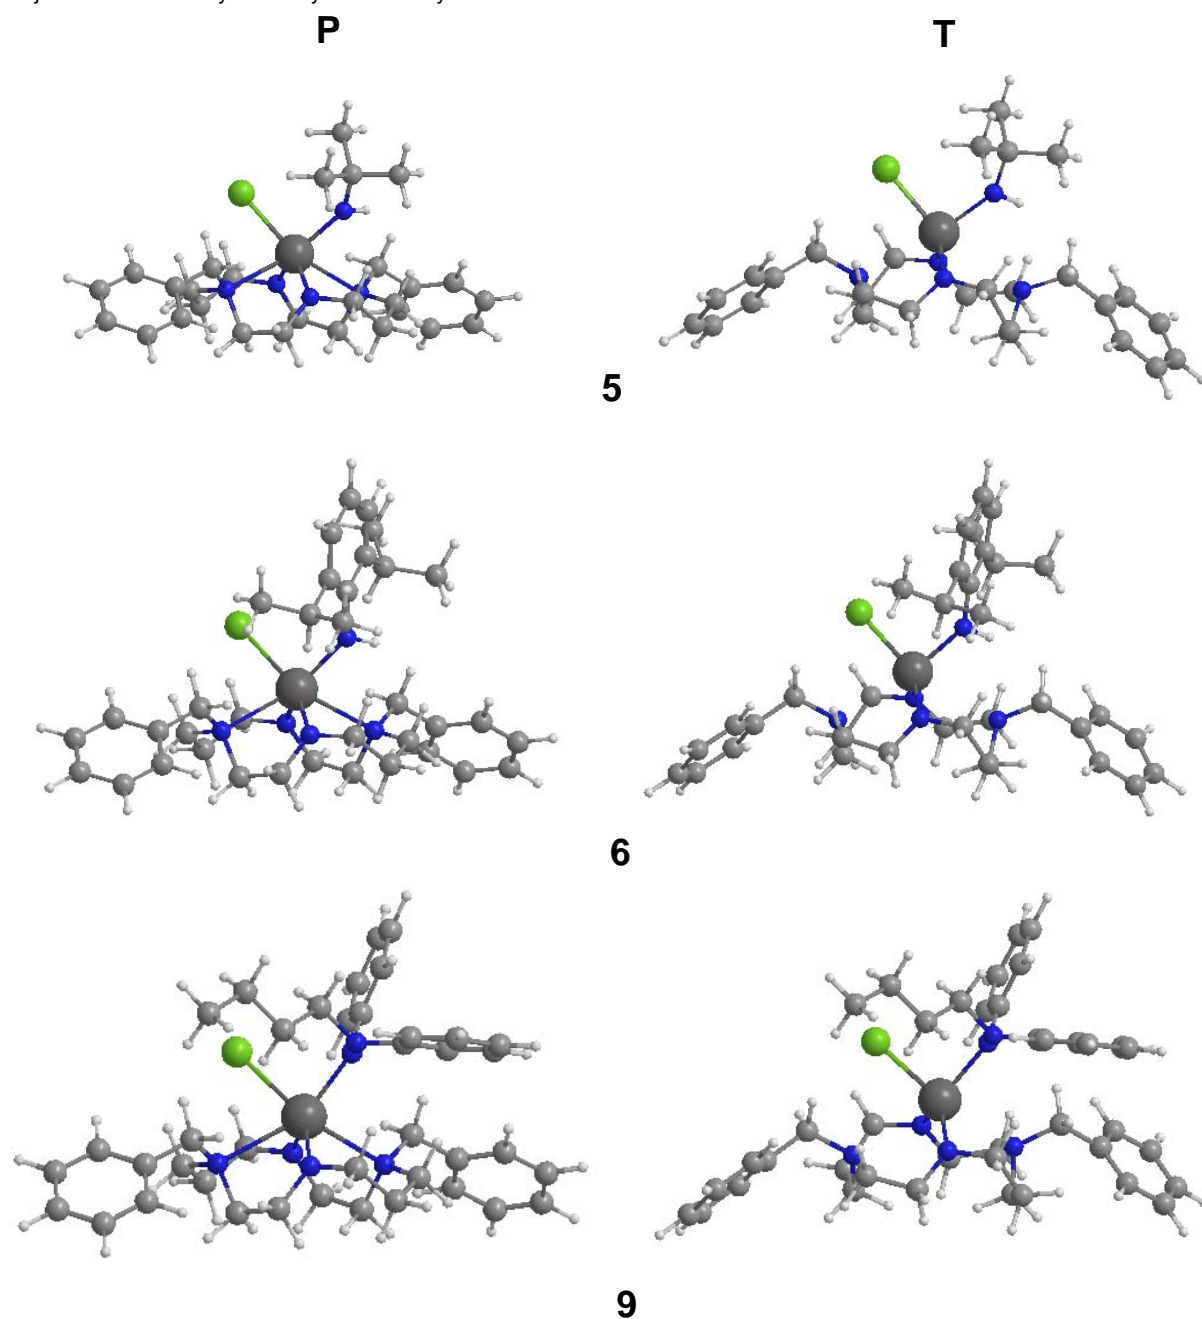

**Figure S2.** Optimized geometry for the **P** (left side) and the **T** (right side) isomers of the chloro amide complexes  $[(\text{Bn}_2\text{Cyclam})\text{ZrCl}(\text{NHR})]$ .  $\text{R} = t\text{-Bu}$  (**5**, top),  $\text{R} = 2,6\text{-}i\text{-PrC}_6\text{H}_4$  (**6**, middle),  $\text{R} = \text{N}(\text{Ph})\text{N}(\text{Ph})(n\text{-Bu})$  (**9**, bottom).

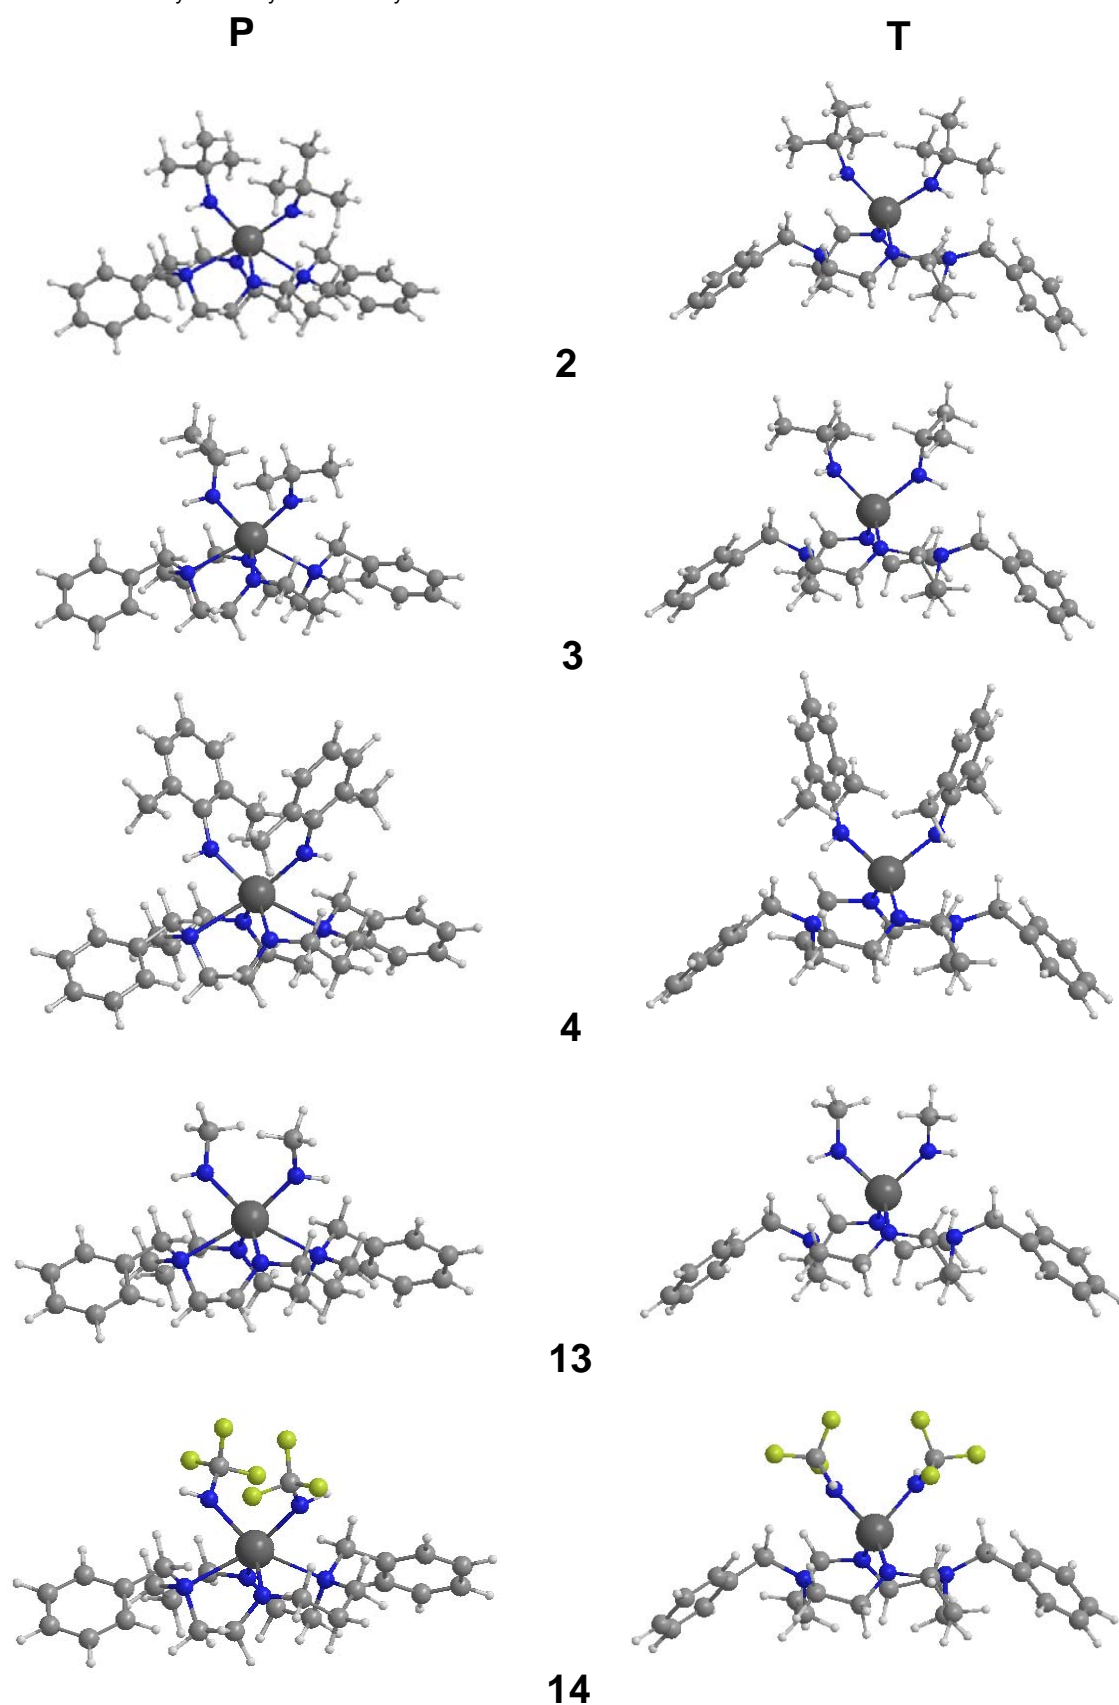

**Figure S3.** Optimized geometry for the **P** (left side) and the **T** (right side) isomers of the bis(amide) complexes  $[(\text{Bn}_2\text{Cyclam})\text{Zr}(\text{NHR})_2]$ : R = *t*-Bu (**2**); R = *i*-Pr (**3**); R = 2,6-MeC<sub>6</sub>H<sub>4</sub> (**4**); R = Me (**13**); R = CF<sub>3</sub> (**14**).

### Atomic Coordinates for the optimized [(Bn<sub>2</sub>Cyclam)ZrXY] complexes (B3LYP/VDZP)

#### (1) X = Y = Cl, isomer P

|    |           |           |           |
|----|-----------|-----------|-----------|
| Zr | 0.000002  | 0.564173  | 0.000020  |
| Cl | 1.472637  | 2.368787  | 0.898536  |
| N  | -0.105279 | -0.602113 | -1.731230 |
| N  | 0.105264  | -0.602202 | 1.731215  |
| C  | 5.640312  | -1.326045 | -3.565805 |
| Cl | -1.472600 | 2.368856  | -0.898402 |
| H  | -5.690085 | -1.956975 | 4.448851  |
| C  | -5.640207 | -1.325933 | 3.565958  |
| H  | 5.690233  | -1.957166 | -4.448638 |
| N  | -2.256958 | -0.459745 | 0.421367  |
| N  | 2.256938  | -0.459786 | -0.421389 |
| C  | -2.961966 | 0.410547  | 1.438819  |
| H  | 3.083780  | 1.383690  | -0.960550 |
| C  | 2.961949  | 0.410485  | -1.438859 |
| H  | -3.083866 | 1.383712  | 0.960445  |
| C  | -1.895774 | -1.782772 | 0.991074  |
| C  | 1.895711  | -1.782784 | -0.991122 |
| H  | 2.265970  | 0.543364  | -2.270863 |
| H  | -2.265966 | 0.543523  | 2.270788  |
| C  | -3.124014 | -0.620736 | -0.788390 |
| C  | 3.124001  | -0.620847 | 0.788353  |
| H  | 1.465072  | -2.371371 | -0.179843 |
| H  | -1.465156 | -2.371352 | 0.179780  |
| H  | 2.787709  | -2.311109 | -1.354887 |
| H  | -2.787787 | -2.311084 | 1.354823  |
| C  | -4.400107 | -0.898079 | 3.088924  |
| C  | 4.400183  | -0.898215 | -3.088822 |
| H  | 3.419884  | 0.388430  | 1.086224  |
| C  | -4.304970 | -0.079095 | 1.953716  |
| C  | 4.304988  | -0.079133 | -1.953691 |
| H  | -3.419877 | 0.388561  | -1.086212 |
| C  | -6.812495 | -0.933303 | 2.918473  |
| C  | 6.812572  | -0.933291 | -2.918345 |
| H  | -4.032440 | -1.164759 | -0.497806 |
| H  | 4.032412  | -1.164876 | 0.497738  |
| C  | 5.494451  | 0.321066  | -1.325223 |
| C  | -5.494460 | 0.320976  | 1.325219  |
| H  | -3.496379 | -1.189461 | 3.617328  |
| H  | 3.496476  | -1.189698 | -3.617206 |
| H  | 7.778704  | -1.261266 | -3.290948 |
| H  | -7.778606 | -1.261298 | 3.291117  |
| C  | -6.736369 | -0.103413 | 1.798390  |
| C  | 6.736388  | -0.103299 | -1.798341 |
| H  | 5.445576  | 0.982912  | -0.464637 |
| H  | -5.445629 | 0.982734  | 0.464564  |
| C  | 2.494584  | -1.319305 | 2.000689  |
| C  | -2.494609 | -1.319143 | -2.000762 |
| C  | 0.853119  | -1.631364 | -2.094341 |
| C  | -0.853160 | -1.631442 | 2.094286  |
| H  | -7.644049 | 0.221855  | 1.298080  |
| H  | 7.644046  | 0.222069  | -1.298055 |
| C  | -1.285452 | -0.590337 | -2.606189 |
| C  | 1.285448  | -0.590502 | 2.606162  |
| H  | -3.288817 | -1.375079 | -2.757803 |
| H  | 3.288795  | -1.375305 | 2.757722  |
| H  | -2.229389 | -2.358295 | -1.770672 |
| H  | 2.229335  | -2.358437 | 1.770540  |
| H  | -1.331101 | -1.397358 | 3.062366  |
| H  | 1.331079  | -1.397242 | -3.062402 |
| H  | -0.371762 | -2.614555 | 2.236748  |
| H  | 0.371694  | -2.614456 | -2.236858 |
| H  | 1.032181  | -1.063331 | 3.566342  |
| H  | -1.032188 | -1.063125 | -3.566390 |
| H  | 1.570373  | 0.442380  | 2.831224  |
| H  | -1.570350 | 0.442563  | -2.831200 |

#### (1) X = Y = Cl, isomer T

|    |           |           |           |
|----|-----------|-----------|-----------|
| Zr | -1.764937 | 1.160210  | -1.312699 |
| N  | -0.061471 | 2.595559  | 0.409254  |
| N  | 0.053461  | 1.500778  | -2.238608 |
| N  | -1.726841 | -0.075718 | 0.347660  |
| N  | -1.054325 | -1.441137 | -2.081202 |
| C  | 0.555982  | 1.556529  | 1.269871  |
| H  | 1.421841  | 1.966349  | 1.812221  |
| H  | 0.940822  | 0.780684  | 0.603997  |
| C  | 1.252211  | 2.077985  | -1.656323 |
| H  | 1.842017  | 2.593332  | -2.432478 |
| H  | 1.925982  | 1.310001  | -1.236344 |
| Cl | -3.383205 | 0.666858  | -3.083047 |

|    |           |           |           |
|----|-----------|-----------|-----------|
| C  | 0.310576  | 0.768828  | -3.479102 |
| H  | 0.917407  | 1.388303  | -4.158381 |
| H  | -0.642276 | 0.609273  | -3.993648 |
| Cl | -3.121830 | 3.109852  | -0.718748 |
| C  | -1.794253 | 0.567795  | 1.660340  |
| H  | -2.345445 | -0.077057 | 2.363151  |
| H  | -2.386468 | 1.483774  | 1.570523  |
| C  | 0.897307  | 3.108531  | -0.596511 |
| H  | 1.815214  | 3.484496  | -0.121306 |
| H  | 0.407769  | 3.952343  | -1.093060 |
| C  | -0.598428 | 3.745003  | 1.209740  |
| H  | -1.319099 | 3.343756  | 1.923590  |
| H  | -1.169786 | 4.360848  | 0.514319  |
| C  | 0.429477  | -1.422516 | -2.123867 |
| H  | 0.827566  | -2.447564 | -2.171121 |
| H  | 0.769880  | -0.996382 | -1.177354 |
| C  | 0.423732  | 4.605905  | 1.937974  |
| C  | -1.551778 | -2.178099 | -0.895859 |
| H  | -1.136372 | -3.195593 | -0.854210 |
| H  | -2.636511 | -2.265284 | -1.013238 |
| C  | -1.377620 | -3.527881 | -3.549882 |
| C  | -0.416243 | 0.906250  | 2.266285  |
| H  | -0.574014 | 1.544937  | 3.143163  |
| H  | 0.070024  | -0.001342 | 2.644172  |
| C  | -1.645045 | -2.047061 | -3.320401 |
| H  | -1.289659 | -1.469209 | -4.174939 |
| H  | -2.719798 | -1.872649 | -3.261520 |
| C  | 1.014919  | -0.588571 | -3.273630 |
| H  | 0.983512  | -1.139783 | -4.220425 |
| H  | 2.078980  | -0.440171 | -3.053498 |
| C  | -1.274307 | -1.454083 | 0.411711  |
| H  | -1.812392 | -1.995536 | 1.207589  |
| H  | -0.204909 | -1.531043 | 0.675699  |
| C  | 0.870593  | 4.288360  | 3.229537  |
| H  | 0.475151  | 3.411816  | 3.735068  |
| C  | 0.920824  | 5.773250  | 1.338026  |
| H  | 0.565015  | 6.057140  | 0.350880  |
| C  | 2.296647  | 6.242072  | 3.270646  |
| H  | 3.016894  | 6.872272  | 3.784355  |
| C  | -2.305080 | -4.488772 | -3.118270 |
| H  | -3.216188 | -4.163829 | -2.622428 |
| C  | 1.849491  | 6.582850  | 1.992891  |
| H  | 2.216283  | 7.483571  | 1.508810  |
| C  | 1.800215  | 5.093944  | 3.889521  |
| H  | 2.128883  | 4.829163  | 4.890610  |
| C  | -0.231609 | -3.976013 | -4.224238 |
| H  | 0.486103  | -3.254196 | -4.603708 |
| C  | -0.006540 | -5.336954 | -4.438313 |
| H  | 0.886707  | -5.659446 | -4.965941 |
| C  | -0.931548 | -6.279440 | -3.987004 |
| H  | -0.760130 | -7.338560 | -4.156375 |
| C  | -2.085997 | -5.850372 | -3.329818 |
| H  | -2.820883 | -6.574458 | -2.989509 |

#### (2) X = Y = NH(<sup>t</sup>Bu), isomer P

|    |           |           |           |
|----|-----------|-----------|-----------|
| Zr | -0.769571 | 0.935577  | 0.007973  |
| N  | 0.755359  | 0.577245  | 2.319422  |
| C  | 2.021138  | 1.861408  | 4.168542  |
| C  | 3.391586  | 2.079531  | 3.963183  |
| H  | 3.757967  | 2.267513  | 2.957745  |
| C  | 1.960449  | 0.046532  | 1.655663  |
| H  | 2.785482  | -0.113090 | 2.368602  |
| H  | 1.691839  | -0.925622 | 1.240244  |
| C  | -0.422732 | -2.224683 | -0.467638 |
| H  | -1.219150 | -2.890681 | -0.851370 |
| H  | 0.232370  | -2.886462 | 0.126899  |
| N  | -0.985804 | -1.153300 | 0.336990  |
| C  | -3.404009 | 1.825237  | 1.920857  |
| C  | -4.268266 | 1.115996  | 0.863815  |
| C  | 1.035042  | 1.875571  | 3.008155  |
| H  | 1.370159  | 2.577404  | 2.240903  |
| H  | 0.078539  | 2.249771  | 3.385545  |
| C  | -3.454036 | 3.674201  | -2.011364 |
| H  | -3.933451 | 3.486404  | -1.049124 |
| H  | -3.905761 | 2.997801  | -2.747113 |
| H  | -3.687330 | 4.701832  | -2.316000 |
| N  | -0.229210 | -0.547229 | -2.279869 |
| C  | -1.429127 | -1.658685 | 1.637103  |
| H  | -1.863669 | -2.666849 | 1.519944  |
| H  | -2.227358 | -1.019521 | 2.021205  |
| C  | -1.927548 | 3.441828  | -1.931261 |



|   |           |           |           |
|---|-----------|-----------|-----------|
| H | 3.802131  | 2.376953  | 2.962897  |
| C | 2.210586  | 0.056661  | 1.636149  |
| H | 3.012034  | -0.021319 | 2.387147  |
| H | 2.030353  | -0.944297 | 1.240075  |
| C | -0.132497 | -2.381399 | -0.490412 |
| H | -0.916962 | -3.069908 | -0.858897 |
| H | 0.564366  | -3.026719 | 0.074855  |
| N | -0.707333 | -1.336867 | 0.338259  |
| C | -3.217150 | 1.871453  | 1.534023  |
| H | -3.477439 | 2.059203  | 0.486298  |
| C | 1.099662  | 1.855248  | 2.899924  |
| H | 1.431911  | 2.542234  | 2.118574  |
| H | 0.099700  | 2.182858  | 3.192893  |
| C | -2.046767 | 3.706126  | -3.024827 |
| H | -2.717897 | 3.063399  | -3.607930 |
| H | -1.048967 | 3.651843  | -3.475865 |
| H | -2.410552 | 4.735874  | -3.120409 |
| N | -0.037575 | -0.649770 | -2.267917 |
| C | -1.112676 | -1.850027 | 1.646915  |
| H | -1.497749 | -2.879306 | 1.546688  |
| H | -1.939669 | -1.246031 | 2.032957  |
| C | -2.001115 | 3.264916  | -1.552753 |
| H | -3.025147 | 3.386190  | -1.152949 |
| C | 0.816272  | 0.074841  | -3.246422 |
| H | 0.188479  | 0.872078  | -3.661583 |
| H | 1.081365  | -0.598325 | -4.075845 |
| C | -1.093804 | 4.196990  | -0.739617 |
| H | -1.038173 | 3.872997  | 0.303509  |
| H | -1.478598 | 5.222831  | -0.758715 |
| H | -0.077760 | 4.207527  | -1.149541 |
| N | 1.493305  | 1.307636  | -0.346183 |
| C | 1.520352  | 1.792932  | 5.405499  |
| H | 0.458250  | 1.608815  | 5.547587  |
| C | -1.102323 | -1.581641 | -5.404982 |
| H | -1.075662 | -0.510749 | -5.589878 |
| C | -1.315355 | -1.073522 | -2.922355 |
| H | -1.795034 | -0.159764 | -3.285200 |
| H | -1.953865 | -1.486815 | -2.137431 |
| C | -1.223468 | -4.325803 | -4.957792 |
| H | -1.283170 | -5.395313 | -4.776319 |
| C | 3.716524  | 2.146482  | 6.353577  |
| H | 4.367933  | 2.225018  | 7.219267  |
| C | -1.224234 | -2.049877 | -4.087632 |
| N | -1.821814 | 1.425224  | 1.551334  |
| H | -1.539904 | 1.319381  | 2.523691  |
| C | 0.434485  | -0.483868 | 3.235006  |
| H | -0.439249 | -0.031603 | 3.719646  |
| H | 1.184785  | -0.632189 | 4.026207  |
| C | 1.899877  | 1.815266  | -1.655344 |
| H | 2.835248  | 2.394401  | -1.565512 |
| H | 1.141452  | 2.510386  | -2.030918 |
| C | 0.665346  | -1.794447 | -1.653599 |
| H | 1.609588  | -1.411874 | -1.263852 |
| H | 0.900574  | -2.574116 | -2.395202 |
| N | -1.571187 | 1.867776  | -1.430339 |
| H | -2.020526 | 1.333050  | -2.169821 |
| C | 4.232402  | 2.316524  | 5.067954  |
| H | 5.287907  | 2.533099  | 4.928671  |
| C | -1.085897 | -3.843406 | -6.260181 |
| H | -1.033357 | -4.534383 | -7.096669 |
| C | 0.020292  | -1.860213 | 2.692467  |
| H | 0.888939  | -2.400474 | 2.297247  |
| H | -0.308790 | -2.436190 | 3.569094  |
| C | 2.354738  | 1.888247  | 6.519778  |
| H | 1.939935  | 1.769068  | 7.516811  |
| C | -1.029844 | -2.466274 | -6.481606 |
| H | -0.938034 | -2.079798 | -7.492795 |
| C | -3.410480 | 3.180132  | 2.320402  |
| H | -2.760798 | 3.969449  | 1.932018  |
| H | -3.163447 | 3.032067  | 3.380522  |
| H | -4.447982 | 3.532134  | 2.270424  |
| C | -4.177320 | 0.787303  | 2.059348  |
| H | -4.080843 | -0.130483 | 1.471318  |
| H | -5.222464 | 1.117849  | 2.014327  |
| H | -3.951741 | 0.543590  | 3.106109  |
| C | 2.631911  | 0.963425  | 0.481057  |
| H | 3.147384  | 1.868191  | 0.859170  |
| H | 3.407881  | 0.413886  | -0.083169 |
| C | 2.105981  | 0.718472  | -2.717023 |
| H | 2.804029  | -0.040706 | -2.343753 |
| H | 2.596388  | 1.161343  | -3.595770 |
| C | -1.295306 | -3.436159 | -3.884561 |
| H | -1.422136 | -3.823042 | -2.877285 |

(3) X = Y = NH(<sup>i</sup>Pr), isomer T

|    |           |           |           |
|----|-----------|-----------|-----------|
| Zr | -0.403864 | 1.327301  | -0.656461 |
| N  | 1.388254  | 2.620650  | 1.234803  |
| N  | 1.508496  | 1.634202  | -1.504980 |
| N  | -0.378474 | -0.050904 | 0.954220  |
| N  | 0.422604  | -1.437727 | -1.512009 |
| C  | 1.933762  | 1.496588  | 2.028162  |
| H  | 2.809825  | 1.816817  | 2.616328  |
| H  | 2.291350  | 0.753837  | 1.312210  |
| C  | -2.563215 | 1.578684  | -3.106586 |
| C  | 2.698707  | 2.142098  | -0.847160 |
| H  | 3.340375  | 2.676097  | -1.571599 |
| H  | 3.338700  | 1.335831  | -0.442399 |
| N  | -1.592967 | 0.842233  | -2.294445 |
| C  | 1.833449  | 0.915268  | -2.733677 |
| H  | 2.486186  | 1.530987  | -3.378389 |
| H  | 0.906502  | 0.764151  | -3.293821 |
| N  | -1.453115 | 3.067592  | -0.177038 |
| C  | -0.452442 | 0.532331  | 2.288388  |
| H  | -1.036273 | -0.117567 | 2.965458  |
| H  | -1.008889 | 1.474029  | 2.224295  |
| C  | 2.372037  | 3.135055  | 0.261915  |
| H  | 3.306996  | 3.450128  | 0.753423  |
| H  | 1.929501  | 4.027304  | -0.196613 |
| C  | 0.866348  | 3.725753  | 2.083229  |
| H  | 0.108152  | 3.305086  | 2.746614  |
| H  | 0.339685  | 4.411681  | 1.415288  |
| C  | 1.894283  | -1.330639 | -1.434442 |
| H  | 2.367807  | -2.326618 | -1.446661 |
| H  | 2.123305  | -0.885769 | -0.464237 |
| C  | 1.885087  | 4.510904  | 2.899239  |
| C  | -0.161452 | -2.143183 | -0.352609 |
| H  | 0.221501  | -3.173444 | -0.269349 |
| H  | -1.240035 | -2.205107 | -0.538785 |
| C  | 0.334894  | -3.526160 | -3.012566 |
| C  | 0.914466  | 0.815671  | 2.953607  |
| H  | 0.740487  | 1.407555  | 3.861285  |
| H  | 1.373804  | -0.119465 | 3.297284  |
| C  | -0.041272 | -2.067865 | -2.777367 |
| H  | 0.324620  | -1.459094 | -3.608565 |
| H  | -1.134654 | -1.995192 | -2.780865 |
| C  | 2.528387  | -0.451203 | -2.523580 |
| H  | 2.560056  | -0.971728 | -3.488981 |
| H  | 3.577771  | -0.307061 | -2.237526 |
| C  | 0.046214  | -1.434852 | 0.981309  |
| H  | -0.533793 | -2.007923 | 1.728790  |
| H  | 1.101135  | -1.547628 | 1.296318  |
| C  | -2.851562 | 3.411508  | 0.094621  |
| C  | 2.276764  | 4.094784  | 4.180618  |
| H  | 1.836478  | 3.200398  | 4.612520  |
| C  | 2.445249  | 5.692759  | 2.391733  |
| H  | 2.138980  | 6.049403  | 1.411353  |
| C  | 3.767156  | 5.988613  | 4.394796  |
| H  | 4.490799  | 6.557781  | 4.971265  |
| C  | -0.526167 | -4.557909 | -2.609913 |
| H  | -1.472321 | -4.308610 | -2.135922 |
| C  | 3.377880  | 6.425053  | 3.127362  |
| H  | 3.794580  | 7.339139  | 2.713536  |
| C  | -3.636818 | 2.171491  | 0.538323  |
| H  | -3.542063 | 1.362993  | -0.192594 |
| H  | -4.700842 | 2.406652  | 0.649774  |
| H  | -3.267948 | 1.802860  | 1.502277  |
| C  | 3.210322  | 4.821924  | 4.920933  |
| H  | 3.495911  | 4.480991  | 5.912244  |
| H  | -2.798245 | 2.503180  | -2.567588 |
| C  | -2.965555 | 4.528404  | 1.144398  |
| H  | -2.542647 | 4.202721  | 2.101462  |
| H  | -4.011739 | 4.811916  | 1.308821  |
| H  | -2.425503 | 5.427558  | 0.823940  |
| C  | 1.533105  | -3.877972 | -3.651120 |
| H  | 2.204789  | -3.098255 | -3.999082 |
| H  | 1.869914  | -5.215807 | -3.863702 |
| H  | 2.802261  | -5.464309 | -4.363063 |
| C  | -3.867993 | 0.785398  | -3.293128 |
| H  | -3.676269 | -0.147270 | -3.840333 |
| H  | -4.608082 | 1.357262  | -3.865303 |
| H  | -4.308175 | 0.522384  | -2.326696 |
| C  | -1.972895 | 1.977168  | -4.471957 |
| H  | -1.066870 | 2.575629  | -4.336900 |
| H  | -2.588507 | 2.559081  | -5.065747 |
| H  | -1.705813 | 1.085036  | -5.053256 |
| H  | -3.334832 | 3.788582  | -0.825738 |
| C  | 1.007838  | -6.230470 | -3.445192 |
| H  | 1.266775  | -7.271962 | -3.612919 |

|   |           |           |           |
|---|-----------|-----------|-----------|
| C | -0.194990 | -5.897031 | -2.820189 |
| H | -0.879383 | -6.678634 | -2.502368 |
| H | -1.442598 | -0.071460 | -2.713555 |
| H | -0.915290 | 3.926919  | -0.289261 |

**(4) X = Y = NH(2,6-MeC<sub>6</sub>H<sub>4</sub>), isomer P**

|    |           |           |           |
|----|-----------|-----------|-----------|
| Zr | 0.768153  | 0.441998  | -0.782736 |
| N  | 1.369220  | 0.672805  | 1.841541  |
| C  | 1.903258  | 2.424396  | 3.669918  |
| C  | 3.255001  | 2.723128  | 3.897083  |
| H  | 3.948698  | 2.736186  | 3.061019  |
| C  | 2.742009  | 0.120629  | 1.791876  |
| H  | 3.240446  | 0.198069  | 2.769830  |
| H  | 2.648841  | -0.938165 | 1.550171  |
| C  | 1.278948  | -2.698621 | -0.491446 |
| H  | 0.660310  | -3.484070 | -0.965361 |
| H  | 1.727374  | -3.187316 | 0.392295  |
| N  | 0.472869  | -1.547801 | -0.130840 |
| C  | 1.385876  | 2.112101  | 2.272860  |
| H  | 1.967639  | 2.656620  | 1.526095  |
| H  | 0.358453  | 2.477685  | 2.205247  |
| C  | -3.014592 | 2.671951  | 0.425427  |
| C  | 0.213341  | 3.770220  | -2.749698 |
| C  | -0.436536 | 2.444926  | -4.696109 |
| C  | -3.091770 | 0.853943  | -1.203968 |
| C  | -0.197028 | 4.917772  | -3.433846 |
| C  | -4.344685 | -2.973917 | 0.124968  |
| N  | 1.989864  | -1.319016 | -2.428915 |
| H  | -4.824790 | 3.795753  | 0.651719  |
| H  | -0.088509 | 5.880562  | -2.939239 |
| C  | -0.403610 | -1.831057 | 1.008920  |
| H  | -0.748459 | -2.877865 | 0.965023  |
| H  | -1.299214 | -1.204405 | 0.946806  |
| C  | 3.145707  | -0.754851 | -3.183334 |
| C  | 0.798824  | 3.919355  | -1.368169 |
| C  | -2.302912 | 3.485938  | 1.481046  |
| H  | 1.710781  | 3.325714  | -1.242374 |
| H  | -1.391022 | 3.963115  | 1.100849  |
| H  | 2.723309  | -0.092828 | -3.947702 |
| H  | 3.665615  | -1.565750 | -3.713995 |
| H  | -2.012082 | 2.878547  | 2.351587  |
| H  | 0.093534  | 3.588420  | -0.599642 |
| H  | -2.952586 | 4.280738  | 1.857110  |
| H  | 1.047482  | 4.965557  | -1.164130 |
| C  | -0.724013 | 4.860549  | -4.721384 |
| C  | -5.057197 | 2.250361  | -0.827268 |
| H  | -1.036190 | 5.776530  | -5.233722 |
| H  | -6.090184 | 2.497206  | -1.053310 |
| N  | 2.793296  | 0.981294  | -0.505302 |
| C  | 1.025595  | 2.462096  | 4.764397  |
| H  | -0.032227 | 2.266112  | 4.608275  |
| C  | 2.058687  | -2.869442 | -5.507547 |
| C  | -2.353375 | 1.606154  | -0.251138 |
| C  | 0.086654  | 2.498794  | -3.371629 |
| H  | 2.127288  | -1.849833 | -5.878379 |
| C  | 1.013905  | -1.951528 | -3.380275 |
| H  | 0.664353  | -1.162294 | -4.050121 |
| C  | -4.419990 | 1.194774  | -1.474151 |
| H  | 0.154183  | -2.268137 | -2.785891 |
| C  | -0.831412 | 3.618814  | -5.341517 |
| C  | 1.840652  | -5.492988 | -4.603643 |
| H  | -1.231632 | 3.550240  | -6.350673 |
| H  | -4.965873 | 0.604168  | -2.206662 |
| C  | -0.565693 | 1.130293  | -5.429955 |
| C  | -2.484593 | -0.325255 | -1.921301 |
| H  | 1.740663  | -6.515045 | -4.249328 |
| C  | 2.836576  | 3.040308  | 6.258591  |
| H  | -1.941000 | -0.985582 | -1.236819 |
| H  | -1.185486 | 0.405361  | -4.887528 |
| H  | 3.196217  | 3.278491  | 7.255418  |
| H  | 0.409964  | 0.653107  | -5.608338 |
| H  | -1.772830 | -0.003351 | -2.687708 |
| H  | -1.024354 | 1.280729  | -6.410853 |
| H  | -3.260329 | -0.918389 | -2.415620 |
| C  | 1.510623  | -3.107068 | -4.237629 |
| N  | -1.018440 | 1.294407  | 0.054612  |
| H  | -0.787557 | 1.749882  | 0.930921  |
| C  | 0.493004  | -0.122849 | 2.747517  |
| H  | -0.479220 | 0.382930  | 2.761777  |
| H  | 0.892340  | -0.081081 | 3.771270  |
| C  | 3.643760  | 1.288533  | -1.658024 |
| H  | 4.500974  | 1.904201  | -1.337268 |
| H  | 3.079737  | 1.889528  | -2.378596 |
| C  | 2.433639  | -2.288028 | -1.401157 |

|   |           |           |           |
|---|-----------|-----------|-----------|
| H | 3.187921  | -1.784130 | -0.795907 |
| H | 2.905583  | -3.170277 | -1.859282 |
| N | 0.498563  | 1.321312  | -2.726019 |
| H | 0.584998  | 0.596779  | -3.430686 |
| C | 3.719924  | 3.024312  | 5.178301  |
| H | 4.770551  | 3.255283  | 5.329906  |
| C | 2.398652  | -5.237808 | -5.857106 |
| H | 2.739490  | -6.058813 | -6.481216 |
| C | 0.258943  | -1.594578 | 2.378457  |
| H | 1.189258  | -2.170205 | 2.452755  |
| H | -0.397417 | -1.995727 | 3.163236  |
| C | 1.484891  | 2.762910  | 6.047027  |
| H | 0.786041  | 2.788979  | 6.878258  |
| C | 2.502045  | -3.921359 | -6.309765 |
| H | 2.919680  | -3.713018 | -7.290682 |
| C | 3.573311  | 0.796187  | 0.704281  |
| H | 3.985203  | 1.759199  | 1.060920  |
| H | 4.458231  | 0.156186  | 0.536281  |
| C | 4.184628  | 0.042236  | -2.381401 |
| H | 4.713190  | -0.606527 | -1.672610 |
| H | 4.942974  | 0.357778  | -3.111436 |
| C | 1.398155  | -4.436918 | -3.805299 |
| H | 0.945316  | -4.650095 | -2.841036 |

**(4) X = Y = NH(2,6-MeC<sub>6</sub>H<sub>4</sub>), isomer T**

|    |           |           |           |
|----|-----------|-----------|-----------|
| Zr | -0.000531 | 0.823001  | 0.000630  |
| N  | -0.340829 | 1.997141  | -1.704467 |
| N  | 2.501214  | 2.467719  | -0.241950 |
| C  | 0.775077  | 2.132377  | -2.640326 |
| H  | 0.405094  | 2.132330  | -3.680533 |
| H  | 1.414398  | 1.249338  | -2.543951 |
| C  | 5.872440  | 2.715309  | 0.341439  |
| H  | 5.668926  | 1.990027  | 1.125334  |
| N  | 1.581651  | -0.531506 | -0.361444 |
| C  | 4.995618  | 2.814920  | -0.749473 |
| C  | 1.639313  | 3.396187  | -2.432106 |
| H  | 1.111922  | 4.287603  | -2.793079 |
| H  | 2.531856  | 3.309162  | -3.063355 |
| C  | 2.013353  | 3.661039  | -0.966401 |
| H  | 2.746590  | 4.482301  | -0.914444 |
| H  | 1.119252  | 4.005554  | -0.444150 |
| C  | 1.151055  | -2.518334 | -1.734700 |
| C  | 2.880366  | -2.582448 | -0.005281 |
| C  | 6.440170  | 4.542906  | -1.678977 |
| H  | 6.661228  | 5.245986  | -2.477137 |
| C  | 1.447774  | -3.848696 | -2.040700 |
| H  | 0.894677  | -4.332715 | -2.842290 |
| C  | 3.759249  | 1.928419  | -0.830602 |
| H  | 3.555435  | 1.668596  | -1.871580 |
| H  | 3.977612  | 0.988278  | -0.316253 |
| C  | 7.294177  | 4.440660  | -0.579885 |
| H  | 8.180051  | 5.065832  | -0.515412 |
| C  | 0.110421  | -1.780610 | -2.537139 |
| H  | 0.516662  | -0.858953 | -2.969791 |
| H  | -0.748433 | -1.494979 | -1.922516 |
| H  | -0.260245 | -2.402415 | -3.357321 |
| C  | 2.433882  | -4.556074 | -1.355843 |
| H  | 2.648078  | -5.590225 | -1.608609 |
| C  | -1.364925 | 3.001463  | -1.938462 |
| H  | -1.614428 | 3.046961  | -3.013514 |
| H  | -1.016933 | 4.018590  | -1.683156 |
| C  | 5.304991  | 3.734903  | -1.762110 |
| H  | 4.660663  | 3.811489  | -2.633478 |
| C  | 1.860747  | -1.869665 | -0.692607 |
| C  | 7.008865  | 3.520008  | 0.429876  |
| H  | 7.674705  | 3.421919  | 1.282667  |
| C  | 3.146092  | -3.910960 | -0.348503 |
| H  | 3.925565  | -4.444364 | 0.191016  |
| C  | 3.689146  | -1.922468 | 1.087518  |
| H  | 3.056995  | -1.492657 | 1.874481  |
| H  | 4.323115  | -1.109000 | 0.704661  |
| H  | 4.359239  | -2.645110 | 1.560984  |
| C  | -2.670979 | 2.715612  | -1.204894 |
| H  | -3.373628 | 3.541975  | -1.400484 |
| H  | -3.113834 | 1.807841  | -1.632387 |
| N  | 0.339676  | 1.998890  | 1.704224  |
| N  | -2.503057 | 2.468407  | 0.240737  |
| C  | -0.776182 | 2.135339  | 2.640040  |
| H  | -0.406003 | 2.137014  | 3.680162  |
| H  | -1.415201 | 1.251976  | 2.544986  |
| C  | -5.873784 | 2.721521  | -0.342813 |
| H  | -5.671172 | 1.996006  | -1.126720 |
| C  | -4.997028 | 2.819806  | 0.748273  |
| C  | -1.640487 | 3.398818  | 2.429998  |



|   |           |           |           |
|---|-----------|-----------|-----------|
| H | -1.113281 | 4.290723  | 2.790050  |
| H | -2.533187 | 3.312489  | 3.061115  |
| C | -2.014147 | 3.662125  | 0.963915  |
| H | -2.746603 | 4.484007  | 0.910903  |
| H | -1.119668 | 4.005162  | 0.441362  |
| C | -6.439272 | 4.549772  | 1.677649  |
| H | -6.659469 | 5.253097  | 2.475830  |
| C | -3.762021 | 1.931408  | 0.829629  |
| H | -3.558616 | 1.671398  | 1.870647  |
| H | -3.982239 | 0.991662  | 0.315257  |
| C | -7.293222 | 4.448828  | 0.578395  |
| H | -8.178196 | 5.075261  | 0.513814  |
| C | 1.363806  | 3.003573  | 1.936744  |
| H | 1.613395  | 3.050415  | 3.011702  |
| H | 1.015783  | 4.020363  | 1.680165  |
| C | -5.305263 | 3.740144  | 1.760926  |
| H | -4.660983 | 3.815761  | 2.632409  |
| C | -7.009039 | 3.527855  | -0.431390 |
| H | -7.674859 | 3.430788  | -1.284313 |
| C | 2.669684  | 2.716614  | 1.203273  |
| H | 3.372612  | 3.543024  | 1.397695  |
| H | 3.112492  | 1.809313  | 1.631838  |
| N | -1.582745 | -0.529441 | 0.370025  |
| C | -1.147702 | -2.520255 | 1.736338  |
| C | -2.875892 | -2.582578 | 0.005700  |
| C | -1.440468 | -3.852841 | 2.036602  |
| H | -0.886599 | -4.338433 | 2.836700  |
| C | -0.110840 | -1.782258 | 2.543514  |
| H | -0.520784 | -0.863059 | 2.977885  |
| H | 0.748535  | -1.492081 | 1.931824  |
| H | 0.259511  | -2.405699 | 3.362607  |
| C | -2.423905 | -4.560413 | 1.348132  |
| H | -2.634977 | -5.596288 | 1.596440  |
| C | -1.858518 | -1.869740 | 0.696199  |
| C | -3.137771 | -3.913322 | 0.343232  |
| H | -3.915457 | -4.446828 | -0.198757 |
| C | -3.686516 | -1.920144 | -1.084216 |
| H | -3.055484 | -1.483863 | -1.868499 |
| H | -4.323605 | -1.110999 | -0.697410 |
| H | -4.353750 | -2.642807 | -1.561674 |
| H | -2.393235 | -0.134698 | -0.100679 |
| H | 2.388832  | -0.138681 | 0.116638  |

**(5) X = Cl, Y = NH(<sup>t</sup>Bu), isomer P**

|    |           |           |           |
|----|-----------|-----------|-----------|
| Zr | -0.622991 | 1.496405  | 0.050508  |
| N  | 0.811872  | 1.286933  | 2.291805  |
| C  | 1.961998  | 2.715341  | 4.116037  |
| C  | 3.323840  | 3.000534  | 3.937232  |
| H  | 3.708721  | 3.169436  | 2.935473  |
| C  | 2.075860  | 0.786928  | 1.706215  |
| H  | 2.867866  | 0.702064  | 2.465220  |
| H  | 1.874443  | -0.214325 | 1.321941  |
| C  | -0.297533 | -1.610111 | -0.433299 |
| H  | -1.105037 | -2.276870 | -0.788428 |
| H  | 0.403149  | -2.271103 | 0.107232  |
| N  | -0.834589 | -0.563777 | 0.421444  |
| C  | -3.392017 | 2.418569  | 1.609768  |
| C  | -4.122861 | 1.526823  | 0.590307  |
| C  | 1.008160  | 2.631836  | 2.932651  |
| H  | 1.323324  | 3.316510  | 2.141962  |
| H  | 0.023785  | 2.964093  | 3.272654  |
| N  | -0.220263 | 0.191193  | -2.140137 |
| C  | -1.264029 | -1.079299 | 1.720563  |
| H  | -1.630613 | -2.113565 | 1.613731  |
| H  | -2.105218 | -0.482934 | 2.087729  |
| C  | 0.621567  | 0.901516  | -3.148389 |
| H  | -0.000199 | 1.710004  | -3.543570 |
| H  | 0.841375  | 0.214846  | -3.977789 |
| N  | 1.378576  | 2.065012  | -0.259755 |
| C  | 1.489203  | 2.547795  | 5.426756  |
| H  | 0.431985  | 2.356554  | 5.592902  |
| C  | -1.514200 | -0.483065 | -5.265106 |
| H  | -1.494384 | 0.598382  | -5.371259 |
| C  | -1.554817 | -0.156022 | -2.748597 |
| H  | -2.026313 | 0.798375  | -2.988613 |
| H  | -2.149179 | -0.619268 | -1.957075 |
| C  | -1.624119 | -3.253458 | -5.012491 |
| H  | -1.680015 | -4.333285 | -4.906264 |
| C  | 3.705804  | 2.905210  | 6.324299  |
| H  | 4.377539  | 2.979317  | 7.174608  |
| C  | -1.546059 | -1.047002 | -3.980127 |
| N  | -1.933056 | 2.204080  | 1.506150  |
| H  | -1.501415 | 2.696399  | 2.285237  |
| C  | 0.243927  | 0.333937  | 3.287921  |

|    |           |           |           |
|----|-----------|-----------|-----------|
| H  | -0.652518 | 0.816335  | 3.692504  |
| H  | 0.953467  | 0.212951  | 4.119244  |
| C  | 1.782383  | 2.593857  | -1.568928 |
| H  | 2.736810  | 3.134557  | -1.466616 |
| H  | 1.046301  | 3.327100  | -1.912468 |
| C  | 0.468586  | -1.009029 | -1.610439 |
| H  | 1.450740  | -0.685713 | -1.260274 |
| H  | 0.628091  | -1.759440 | -2.398904 |
| Cl | -1.676034 | 3.035167  | -1.682670 |
| C  | 4.189540  | 3.091059  | 5.028474  |
| H  | 5.239852  | 3.315884  | 4.865819  |
| C  | -1.574498 | -2.676508 | -6.282289 |
| H  | -1.586660 | -3.304044 | -7.168879 |
| C  | -0.152638 | -1.060715 | 2.784029  |
| H  | 0.722808  | -1.613618 | 2.422285  |
| H  | -0.500262 | -1.608160 | 3.671426  |
| C  | 2.349996  | 2.637426  | 6.521139  |
| H  | 1.960159  | 2.506568  | 7.526626  |
| C  | -1.524226 | -1.286760 | -6.405488 |
| H  | -1.502008 | -0.827147 | -7.389631 |
| C  | -3.726223 | 3.900737  | 1.336833  |
| H  | -3.376218 | 4.188566  | 0.342827  |
| H  | -3.234641 | 4.546964  | 2.074304  |
| H  | -4.805994 | 4.083092  | 1.399801  |
| C  | -3.860605 | 2.045446  | 3.033123  |
| H  | -3.656638 | 0.991600  | 3.250329  |
| H  | -4.936303 | 2.216894  | 3.155011  |
| H  | -3.342296 | 2.654195  | 3.784843  |
| C  | 2.520471  | 1.673010  | 0.544962  |
| H  | 3.069783  | 2.602296  | 0.910504  |
| H  | 3.262156  | 1.098295  | -0.037612 |
| C  | 1.939985  | 1.510019  | -2.650329 |
| H  | 2.633729  | 0.732744  | -2.306701 |
| H  | 2.413348  | 1.957864  | -3.535032 |
| C  | -1.613699 | -2.444444 | -3.874824 |
| H  | -1.676375 | -2.904741 | -2.892323 |
| H  | -5.207409 | 1.641628  | 0.691480  |
| H  | -3.878599 | 0.470848  | 0.749657  |
| H  | -3.852145 | 1.800612  | -0.432959 |

**(5) X = Cl, Y = NH(<sup>t</sup>Bu), isomer T**

|    |           |           |           |
|----|-----------|-----------|-----------|
| Zr | -0.588586 | 1.102502  | -1.314838 |
| N  | 1.363649  | 2.703205  | 0.512028  |
| N  | 1.212010  | 1.641374  | -2.214728 |
| N  | -0.317874 | -0.067407 | 0.397916  |
| N  | 0.266818  | -1.409406 | -2.106521 |
| C  | 2.006891  | 1.599027  | 1.251200  |
| H  | 2.925440  | 1.939460  | 1.758506  |
| H  | 2.316484  | 0.861129  | 0.508384  |
| C  | 2.443391  | 2.211035  | -1.699750 |
| H  | 2.975576  | 2.750720  | -2.502305 |
| H  | 3.151037  | 1.435131  | -1.356867 |
| Cl | -2.337325 | 0.507029  | -2.977740 |
| C  | 1.402898  | 0.945471  | -3.488326 |
| H  | 1.905174  | 1.607679  | -4.212618 |
| H  | 0.418669  | 0.731881  | -3.924414 |
| N  | -1.625101 | 2.720538  | -0.591175 |
| C  | -0.309701 | 0.538283  | 1.726894  |
| H  | -0.794857 | -0.134818 | 2.455430  |
| H  | -0.916796 | 1.445573  | 1.685416  |
| C  | 2.205263  | 3.218814  | -0.580050 |
| H  | 3.181785  | 3.578850  | -0.214878 |
| H  | 1.680842  | 4.082091  | -1.006556 |
| C  | 0.910090  | 3.807096  | 1.395724  |
| H  | 0.211338  | 3.387782  | 2.123119  |
| H  | 0.333954  | 4.499845  | 0.772519  |
| C  | 1.740005  | -1.274998 | -2.224092 |
| H  | 2.215489  | -2.264168 | -2.311442 |
| H  | 2.094489  | -0.835705 | -1.289104 |
| C  | 1.989970  | 4.601733  | 2.120597  |
| C  | -0.119407 | -2.163426 | -0.889893 |
| H  | 0.350014  | -3.158402 | -0.870511 |
| H  | -1.203571 | -2.309030 | -0.946193 |
| C  | 0.038935  | -3.510014 | -3.572271 |
| C  | 1.094461  | 0.893873  | 2.266010  |
| H  | 0.967941  | 1.496874  | 3.173713  |
| H  | 1.622826  | -0.011854 | 2.588793  |
| C  | -0.339347 | -2.058761 | -3.313058 |
| H  | -0.083298 | -1.448789 | -4.181244 |
| H  | -1.420332 | -1.975594 | -3.193796 |
| C  | 2.195327  | -0.376665 | -3.383565 |
| H  | 2.124588  | -0.898387 | -4.345242 |
| H  | 3.262718  | -0.173827 | -3.234490 |
| C  | 0.197930  | -1.426304 | 0.404802  |

Supplementary Material (ESI) for Dalton Transactions  
This journal is © The Royal Society of Chemistry 2009

|   |           |           |           |
|---|-----------|-----------|-----------|
| H | -0.262027 | -2.008055 | 1.223030  |
| H | 1.284908  | -1.463781 | 0.601675  |
| C | -3.009566 | 3.203763  | -0.400129 |
| C | 2.462067  | 4.209429  | 3.381783  |
| H | 2.039074  | 3.332791  | 3.864474  |
| C | 2.531520  | 5.760457  | 1.544301  |
| H | 2.162870  | 6.099048  | 0.579107  |
| C | 3.993019  | 6.081524  | 3.443996  |
| H | 4.763539  | 6.652048  | 3.954501  |
| C | -0.766997 | -4.550334 | -3.084779 |
| H | -1.665903 | -4.308318 | -2.523524 |
| C | 3.524413  | 6.493648  | 2.195298  |
| H | 3.925895  | 7.389937  | 1.730801  |
| C | -3.931861 | 2.013597  | -0.082437 |
| H | -3.942100 | 1.295375  | -0.905381 |
| H | -4.958532 | 2.359675  | 0.079839  |
| H | -3.597436 | 1.499820  | 0.825288  |
| C | 3.455612  | 4.938344  | 4.037465  |
| H | 3.803471  | 4.617316  | 5.015366  |
| C | -3.040599 | 4.190324  | 0.785054  |
| H | -2.698195 | 3.705602  | 1.705564  |
| H | -4.054948 | 4.567441  | 0.955394  |
| H | -2.395060 | 5.056805  | 0.593643  |
| C | 1.170584  | -3.853699 | -4.327366 |
| H | 1.793798  | -3.069955 | -4.748944 |
| C | 1.499797  | -5.188856 | -4.567493 |
| H | 2.379622  | -5.429677 | -5.157699 |
| C | -3.498230 | 3.921252  | -1.676699 |
| H | -2.852258 | 4.776305  | -1.907828 |
| H | -4.522245 | 4.294750  | -1.555026 |
| H | -3.474664 | 3.235636  | -2.527255 |
| C | 0.695341  | -6.210662 | -4.061218 |
| H | 0.947533  | -7.250132 | -4.250474 |
| C | -0.443712 | -5.886806 | -3.322021 |
| H | -1.085841 | -6.673963 | -2.936844 |
| H | -0.984296 | 3.495712  | -0.425347 |

(6) X = Cl, Y = NH(2,6-*i*-PrC<sub>6</sub>H<sub>4</sub>), isomer P

|    |           |           |           |
|----|-----------|-----------|-----------|
| Zr | 1.287947  | 0.326962  | 0.453579  |
| Cl | 3.236197  | -0.464548 | 1.821964  |
| N  | -1.099668 | 1.596669  | 0.333418  |
| N  | -0.239411 | -0.823252 | 1.307209  |
| N  | 1.844718  | -1.911264 | -0.697265 |
| N  | 1.049581  | 0.553111  | -1.615786 |
| N  | 1.801515  | 2.295966  | 1.044236  |
| H  | 0.986275  | 2.793629  | 1.384609  |
| C  | -1.931933 | 0.409596  | 0.033285  |
| H  | -1.652795 | 0.068308  | -0.964451 |
| H  | -3.002205 | 0.663535  | 0.013021  |
| C  | -1.659604 | -0.717956 | 1.027349  |
| H  | -2.232631 | -0.572252 | 1.960529  |
| H  | -2.065152 | -1.644562 | 0.584123  |
| C  | 0.108927  | -2.094352 | 1.954692  |
| H  | -0.703678 | -2.393779 | 2.635538  |
| H  | 0.998924  | -1.955194 | 2.576601  |
| C  | 0.372080  | -3.238060 | 0.959008  |
| H  | 0.446202  | -4.182610 | 1.515182  |
| H  | -0.487359 | -3.359099 | 0.288087  |
| C  | 1.682563  | -3.117287 | 0.168961  |
| H  | 2.511875  | -3.087745 | 0.881922  |
| H  | 1.806731  | -4.019605 | -0.445888 |
| C  | 0.847901  | -1.888160 | -1.794201 |
| H  | -0.135604 | -2.008090 | -1.335737 |
| H  | 0.996101  | -2.729356 | -2.486911 |
| C  | 0.883793  | -0.555361 | -2.542611 |
| H  | 1.686040  | -0.551862 | -3.302585 |
| H  | -0.056807 | -0.478499 | -3.116308 |
| C  | 0.750650  | 1.846918  | -2.230254 |
| H  | 1.050940  | 1.837100  | -3.290500 |
| H  | 1.347632  | 2.626416  | -1.745119 |
| C  | -0.733222 | 2.239778  | -2.138929 |
| H  | -0.908354 | 3.122293  | -2.769548 |
| H  | -1.361008 | 1.446362  | -2.562093 |
| C  | -1.209579 | 2.630903  | -0.734170 |
| H  | -0.609962 | 3.484903  | -0.397438 |
| H  | -2.251480 | 2.975409  | -0.802664 |
| C  | -1.478856 | 2.196119  | 1.658979  |
| H  | -0.793366 | 3.027958  | 1.836918  |
| H  | -1.271658 | 1.439668  | 2.419217  |
| C  | -2.898249 | 2.724956  | 1.813719  |
| C  | -3.203237 | 4.056928  | 1.492606  |
| H  | -2.415458 | 4.713406  | 1.132354  |
| C  | -4.496493 | 4.557763  | 1.645301  |
| H  | -4.707402 | 5.592962  | 1.392577  |

|   |           |           |           |
|---|-----------|-----------|-----------|
| C | -5.512618 | 3.733948  | 2.132682  |
| H | -6.519354 | 4.122368  | 2.256386  |
| C | -5.222510 | 2.412347  | 2.474388  |
| H | -6.002243 | 1.768020  | 2.870584  |
| C | -3.927027 | 1.916396  | 2.319437  |
| H | -3.710381 | 0.892440  | 2.610262  |
| C | 3.254645  | -1.861081 | -1.229065 |
| H | 3.897103  | -1.760376 | -0.353129 |
| H | 3.343667  | -0.933557 | -1.799100 |
| C | 3.718607  | -3.035751 | -2.075258 |
| C | 4.373205  | -4.125967 | -1.481117 |
| H | 4.544169  | -4.123658 | -0.407851 |
| C | 4.822389  | -5.201872 | -2.247521 |
| H | 5.329547  | -6.032987 | -1.765632 |
| C | 4.631211  | -5.204660 | -3.630489 |
| H | 4.983938  | -6.039282 | -4.229567 |
| C | 3.997705  | -4.120770 | -4.239924 |
| H | 3.859511  | -4.105470 | -5.317434 |
| C | 3.550490  | -3.046906 | -3.468266 |
| H | 3.080607  | -2.198136 | -3.957852 |
| C | 2.961815  | 2.966863  | 1.506952  |
| C | 2.950615  | 3.623830  | 2.773332  |
| C | 4.086461  | 4.317615  | 3.197675  |
| H | 4.072544  | 4.822889  | 4.158865  |
| C | 5.242886  | 4.363172  | 2.424158  |
| H | 6.118674  | 4.903270  | 2.772495  |
| C | 5.260569  | 3.699308  | 1.203361  |
| H | 6.161588  | 3.730725  | 0.596558  |
| C | 4.146055  | 3.000492  | 0.724930  |
| C | 1.711990  | 3.595818  | 3.665336  |
| H | 1.129654  | 2.709788  | 3.388475  |
| C | 2.031721  | 3.440106  | 5.162742  |
| H | 1.106716  | 3.297946  | 5.732826  |
| H | 2.530524  | 4.324315  | 5.573784  |
| H | 2.677845  | 2.575110  | 5.338334  |
| C | 0.831117  | 4.842365  | 3.431590  |
| H | -0.101371 | 4.787867  | 4.006185  |
| H | 0.573286  | 4.967850  | 2.373215  |
| H | 1.363934  | 5.749403  | 3.737990  |
| C | 4.239156  | 3.572281  | -0.654472 |
| H | 3.328124  | 1.775915  | -0.824050 |
| C | 4.293684  | 3.429191  | -1.762515 |
| H | 4.300547  | 2.965661  | -2.756247 |
| H | 5.198402  | 4.041134  | -1.673435 |
| H | 3.433326  | 4.104087  | -1.705881 |
| C | 5.428154  | 1.386046  | -0.776331 |
| H | 5.420605  | 0.891636  | -1.755254 |
| H | 5.385838  | 0.619775  | 0.002301  |
| H | 6.386961  | 1.907772  | -0.685482 |

(6) X = Cl, Y = NH(2,6-*i*-PrC<sub>6</sub>H<sub>4</sub>), isomer T

|    |           |           |           |
|----|-----------|-----------|-----------|
| Zr | -0.093016 | 1.171985  | 0.543711  |
| N  | -0.356376 | 2.280098  | -1.204812 |
| N  | 2.524006  | 2.717182  | 0.175301  |
| C  | 0.721969  | 2.393593  | -2.182002 |
| H  | 0.309461  | 2.405440  | -3.205268 |
| H  | 1.338831  | 1.493563  | -2.109768 |
| C  | 5.930082  | 2.821850  | 0.630289  |
| H  | 5.731050  | 2.113034  | 1.430241  |
| N  | 1.363857  | -0.230198 | 0.064178  |
| C  | 5.012666  | 2.947099  | -0.423729 |
| C  | 1.619301  | 3.638077  | -2.007518 |
| H  | 1.099706  | 4.538758  | -2.357623 |
| H  | 2.489133  | 3.527073  | -2.666349 |
| C  | 2.046964  | 3.909290  | -0.557697 |
| H  | 2.803231  | 4.711174  | -0.540998 |
| H  | 1.178898  | 4.286129  | -0.012912 |
| C  | 0.831455  | -2.259698 | -1.226738 |
| C  | 2.236515  | -2.417947 | 0.780957  |
| C  | 6.485253  | 4.603812  | -1.434384 |
| H  | 6.700539  | 5.288903  | -2.249576 |
| C  | 0.988136  | -3.639337 | -1.403933 |
| H  | 0.507451  | -4.119800 | -2.251782 |
| C  | 3.737503  | 2.112984  | -0.440666 |
| H  | 3.488783  | 1.838108  | -1.468148 |
| H  | 3.937077  | 1.178326  | 0.094801  |
| C  | 7.380791  | 4.476998  | -0.371479 |
| H  | 8.293699  | 5.065199  | -0.352417 |
| C  | 0.034754  | -1.474348 | -2.264261 |
| H  | -0.093328 | -0.454269 | -1.894121 |
| C  | -1.374691 | -2.049572 | -2.494503 |
| C  | 0.812093  | -1.377426 | -3.592876 |
| C  | 1.754449  | -4.407677 | -0.533963 |
| H  | 1.866627  | -5.476067 | -0.695917 |





**(11) X = Y = H, isomer T**

|    |           |           |           |
|----|-----------|-----------|-----------|
| Zr | -1.298806 | 0.993362  | -1.182202 |
| N  | 0.181937  | 2.516227  | 0.432037  |
| N  | 0.485961  | 1.391583  | -2.177602 |
| N  | -1.328364 | -0.243845 | 0.491256  |
| N  | -0.786053 | -1.480837 | -2.024063 |
| C  | 0.835710  | 1.579128  | 1.384686  |
| H  | 1.641886  | 2.091537  | 1.931862  |
| H  | 1.312904  | 0.806635  | 0.776314  |
| C  | 1.642055  | 2.001834  | -1.556224 |
| H  | 2.258190  | 2.530133  | -2.304188 |
| H  | 2.323123  | 1.271420  | -1.079581 |
| H  | -2.740062 | 0.593076  | -2.328220 |
| C  | 0.716113  | 0.684430  | -3.427074 |
| H  | 1.362079  | 1.276713  | -4.095429 |
| H  | -0.244126 | 0.602963  | -3.955165 |
| H  | -2.311893 | 2.568103  | -0.976759 |
| C  | -1.440357 | 0.406794  | 1.786428  |
| H  | -1.941400 | -0.254427 | 2.511986  |
| H  | -2.109713 | 1.271369  | 1.676418  |
| C  | 1.179480  | 3.044891  | -0.538957 |
| H  | 2.044110  | 3.477858  | -0.014937 |
| H  | 0.682078  | 3.846629  | -1.092393 |
| C  | -0.514364 | 3.655443  | 1.115907  |
| H  | -1.239812 | 3.226397  | 1.809778  |
| H  | -1.092940 | 4.158840  | 0.338843  |
| C  | 0.693570  | -1.569165 | -2.147280 |
| H  | 1.005619  | -2.619127 | -2.257998 |
| H  | 1.101502  | -1.219038 | -1.195649 |
| C  | 0.366054  | 4.657546  | 1.848302  |
| C  | -1.252294 | -2.267683 | -0.848793 |
| H  | -0.870114 | -3.298070 | -0.892088 |
| H  | -2.343382 | -2.308895 | -0.913254 |
| C  | -1.415692 | -3.414398 | -3.602262 |
| C  | -0.104409 | 0.893186  | 2.390341  |
| H  | -0.327736 | 1.554020  | 3.236964  |
| H  | 0.452017  | 0.047379  | 2.813217  |
| C  | -1.507458 | -1.934975 | -3.258822 |
| H  | -1.133624 | -1.338963 | -4.093623 |
| H  | -2.550383 | -1.645259 | -3.116219 |
| C  | 1.316393  | -0.731713 | -3.276600 |
| H  | 1.234369  | -1.246439 | -4.241779 |
| H  | 2.390890  | -0.668372 | -3.063756 |
| C  | -0.891915 | -1.623514 | 0.489986  |
| H  | -1.408462 | -2.200955 | 1.276096  |
| H  | 0.187328  | -1.744390 | 0.700789  |
| C  | 0.755056  | 4.459911  | 3.181800  |
| H  | 0.413861  | 3.577381  | 3.715863  |
| C  | 0.788173  | 5.831615  | 1.206179  |
| H  | 0.474302  | 6.020739  | 0.182808  |
| C  | 1.980339  | 6.545673  | 3.185302  |
| H  | 2.600831  | 7.273137  | 3.700736  |
| C  | -2.420642 | -4.300625 | -3.185356 |
| H  | -3.266822 | -3.917736 | -2.620596 |
| C  | 1.588959  | 6.766140  | 1.863583  |
| H  | 1.899819  | 7.669516  | 1.346355  |
| C  | 1.556970  | 5.390642  | 3.844493  |
| H  | 1.843101  | 5.217345  | 4.878176  |
| C  | -0.355156 | -3.930958 | -4.361778 |
| H  | 0.418732  | -3.262311 | -4.728482 |
| C  | -0.287798 | -5.289590 | -4.675116 |
| H  | 0.541564  | -5.666265 | -5.267279 |
| C  | -1.288591 | -6.159361 | -4.239401 |
| H  | -1.240148 | -7.216071 | -4.486200 |
| C  | -2.359455 | -5.659341 | -3.496466 |
| H  | -3.151702 | -6.325069 | -3.165714 |

**(12) X = Y = <sup>n</sup>Bu, isomer P**

|    |           |           |           |
|----|-----------|-----------|-----------|
| Zr | -0.380492 | -0.312191 | 0.309021  |
| N  | 0.354578  | -0.300430 | -1.670274 |
| C  | 0.789885  | 0.875268  | -2.401061 |
| H  | 0.201588  | 1.012201  | -3.327813 |
| H  | 1.838414  | 0.790629  | -2.737528 |
| C  | -2.961178 | -0.267717 | 2.378124  |
| H  | -3.051059 | -1.357440 | 2.277331  |
| H  | -2.205394 | -0.106308 | 3.164744  |
| C  | -2.482578 | 0.347463  | 1.050124  |
| H  | -2.504741 | 1.443602  | 1.166315  |
| H  | -3.228535 | 0.129730  | 0.267209  |
| C  | -4.760684 | -0.346256 | 4.214162  |
| H  | -5.718179 | 0.066246  | 4.551521  |
| H  | -4.025850 | -0.171109 | 5.009199  |
| H  | -4.883605 | -1.431273 | 4.115478  |
| C  | -4.305095 | 0.280978  | 2.891760  |

|   |           |           |           |
|---|-----------|-----------|-----------|
| H | -5.072167 | 0.116521  | 2.122255  |
| H | -4.225774 | 1.371020  | 3.010669  |
| C | 2.814653  | -3.318269 | 2.521479  |
| C | 3.034839  | -4.644786 | 2.119850  |
| H | 2.334667  | -5.117872 | 1.436008  |
| C | 4.807318  | -3.470389 | 3.916066  |
| H | 5.487620  | -3.009667 | 4.626897  |
| N | -0.530141 | 2.120175  | -0.700610 |
| C | -1.251611 | -2.467637 | 0.387310  |
| H | -0.485339 | -3.186670 | 0.053279  |
| H | -1.458494 | -2.739147 | 1.436402  |
| N | 0.819858  | 0.651378  | 1.754026  |
| N | 1.809331  | -1.721360 | 0.759628  |
| C | 3.712510  | -2.748950 | 3.437060  |
| H | 3.544016  | -1.735909 | 3.792178  |
| C | 5.020744  | -4.783004 | 3.492698  |
| H | 5.869854  | -5.347263 | 3.867562  |
| C | -2.339568 | 5.881380  | -3.821732 |
| H | -2.489989 | 6.796093  | -4.387931 |
| C | -1.950718 | 3.505086  | -2.352881 |
| C | 4.127068  | -5.370887 | 2.595636  |
| H | 4.274917  | -6.397553 | 2.272606  |
| C | 0.363701  | 1.906396  | 2.355307  |
| H | 0.921474  | 2.096387  | 3.286201  |
| H | -0.688160 | 1.818563  | 2.654493  |
| C | -1.441216 | 3.641659  | -3.653027 |
| H | -0.906118 | 2.812471  | -4.107941 |
| C | -2.677179 | 4.577726  | -1.813167 |
| H | -3.108113 | 4.483618  | -0.819606 |
| C | -1.761302 | 2.221820  | -1.557558 |
| H | -2.611258 | 2.086312  | -0.886921 |
| H | -1.746915 | 1.362556  | -2.232211 |
| C | 0.834162  | -1.546202 | -2.272742 |
| H | 0.872109  | -1.437651 | -3.368512 |
| H | 0.119356  | -2.355863 | -2.080516 |
| C | 0.705758  | 2.119175  | -1.517239 |
| H | 1.546356  | 2.108486  | -0.819593 |
| H | 0.786362  | 3.035652  | -2.121379 |
| C | 0.517770  | 3.132045  | 1.432814  |
| H | 0.385486  | 4.046702  | 2.027729  |
| H | 1.543762  | 3.176027  | 1.047291  |
| C | -1.628964 | 4.818128  | -4.380528 |
| H | -1.227868 | 4.899834  | -5.386910 |
| C | -0.509039 | 3.229254  | 0.294841  |
| H | -1.507084 | 3.265499  | 0.743413  |
| H | -0.364528 | 4.184949  | -0.229976 |
| C | -4.264490 | -4.405482 | -1.301594 |
| H | -4.579097 | -5.455092 | -1.290854 |
| H | -4.106435 | -4.117727 | -2.347963 |
| H | -5.098831 | -3.805379 | -0.919618 |
| C | 2.768764  | -0.614644 | 0.981478  |
| H | 2.901925  | -0.113273 | 0.020117  |
| H | 3.752161  | -0.995713 | 1.296391  |
| C | 2.229633  | 0.400405  | 1.987985  |
| H | 2.410020  | 0.058943  | 3.024744  |
| H | 2.838248  | 1.315515  | 1.878466  |
| C | 1.612154  | -2.543696 | 2.002804  |
| H | 0.803009  | -3.241249 | 1.780737  |
| H | 1.244494  | -1.862830 | 2.774203  |
| C | -2.518718 | -2.719331 | -0.450346 |
| H | -3.342407 | -2.093476 | -0.082319 |
| H | -2.352220 | -2.403339 | -1.493644 |
| C | 2.254039  | -2.592397 | -0.364395 |
| H | 1.597157  | -3.468393 | -0.360371 |
| H | 3.270169  | -2.959792 | -0.158717 |
| C | 2.225436  | -1.985174 | -1.774795 |
| H | 2.928907  | -1.147702 | -1.860151 |
| H | 2.614028  | -2.768161 | -2.441035 |
| C | -2.868434 | 5.755771  | -2.535849 |
| H | -3.437038 | 6.571441  | -2.098106 |
| C | -2.997420 | -4.182807 | -0.468197 |
| H | -2.188396 | -4.820766 | -0.851845 |
| H | -3.174879 | -4.509879 | 0.565841  |

**(12) X = Y = <sup>n</sup>Bu, isomer T**

|    |           |           |           |
|----|-----------|-----------|-----------|
| Zr | 0.063678  | 1.260409  | -0.195721 |
| N  | 1.719311  | 2.569855  | 1.830023  |
| N  | 1.991988  | 1.576327  | -0.938556 |
| N  | -0.063183 | -0.048481 | 1.427007  |
| C  | -2.156074 | 3.515900  | 0.861621  |
| C  | -1.545225 | 1.148318  | -3.108823 |
| N  | 0.853898  | -1.405675 | -1.025057 |
| H  | -1.284763 | 2.216390  | -3.173538 |
| H  | -2.902010 | 2.727676  | 0.674965  |

Supplementary Material (ESI) for Dalton Transactions  
This journal is © The Royal Society of Chemistry 2009

|   |           |           |           |
|---|-----------|-----------|-----------|
| C | 2.201965  | 1.443228  | 2.655811  |
| H | -0.722406 | 0.615017  | -3.611012 |
| H | 3.038861  | 1.752297  | 3.303239  |
| H | -1.861447 | 3.397059  | 1.916514  |
| C | -0.937489 | 3.318222  | -0.056552 |
| C | -1.637177 | 0.714534  | -1.635929 |
| H | 2.599881  | 0.694126  | 1.967362  |
| H | -1.883605 | -0.357172 | -1.584998 |
| H | -0.198934 | 4.110362  | 0.139946  |
| C | 3.140987  | 2.063806  | -0.196990 |
| H | -1.256561 | 3.486931  | -1.099935 |
| H | -2.500655 | 1.223140  | -1.173668 |
| H | 3.834319  | 2.596371  | -0.872106 |
| C | -4.066557 | 5.050691  | 1.643195  |
| C | -2.700963 | 1.348858  | -5.397433 |
| H | -3.629309 | 1.173399  | -5.952141 |
| H | -4.540605 | 6.029873  | 1.513447  |
| H | 3.740770  | 1.244963  | 0.241563  |
| H | -1.902131 | 0.795902  | -5.906245 |
| H | -3.775865 | 4.960895  | 2.696873  |
| C | 2.345089  | 0.876399  | -2.165982 |
| H | -2.463708 | 2.416282  | -5.478057 |
| H | -4.827333 | 4.285931  | 1.446645  |
| C | -2.826494 | 0.919182  | -3.931741 |
| C | -2.857193 | 4.879101  | 0.717521  |
| H | 3.002536  | 1.501992  | -2.793591 |
| H | -3.171105 | 5.005271  | -0.327546 |
| H | 1.432341  | 0.732756  | -2.759959 |
| H | -3.653490 | 1.463946  | -3.456411 |
| H | -2.127473 | 5.677526  | 0.912359  |
| H | -3.096611 | -0.144969 | -3.880604 |
| C | -0.215413 | 0.542013  | 2.750068  |
| H | -0.874661 | -0.081245 | 3.378135  |
| H | -0.739901 | 1.500912  | 2.644429  |
| C | 2.752237  | 3.061468  | 0.892711  |
| H | 3.663711  | 3.376298  | 1.425944  |
| H | 2.335027  | 3.948201  | 0.403829  |
| C | 1.186384  | 3.695843  | 2.648881  |
| H | 0.384578  | 3.299889  | 3.276497  |
| H | 0.720529  | 4.395033  | 1.950266  |
| C | 2.326729  | -1.373510 | -0.901922 |
| H | 2.751982  | -2.390008 | -0.927101 |
| H | 2.551810  | -0.964545 | 0.085596  |
| C | 2.181335  | 4.451918  | 3.519691  |
| C | 0.211661  | -2.119229 | 0.101118  |
| H | 0.577679  | -3.155030 | 0.181455  |
| H | -0.858389 | -2.164713 | -0.127952 |
| C | 0.684045  | -3.462376 | -2.555921 |
| C | 1.108484  | 0.780963  | 3.508876  |
| H | 0.890877  | 1.371491  | 4.407408  |
| H | 1.514928  | -0.170331 | 3.873459  |
| C | 0.400376  | -1.983731 | -2.323054 |
| H | 0.854309  | -1.397531 | -3.125173 |
| H | -0.677069 | -1.812263 | -2.380269 |
| C | 3.021552  | -0.496739 | -1.955511 |
| H | 3.080721  | -1.007197 | -2.924595 |
| H | 4.060435  | -0.363298 | -1.630168 |
| C | 0.373266  | -1.432256 | 1.455164  |
| H | -0.234103 | -2.012112 | 2.172787  |
| H | 1.415535  | -1.539894 | 1.807982  |
| C | 2.459951  | 4.045807  | 4.833228  |
| H | 1.946782  | 3.182477  | 5.248179  |
| C | 2.829424  | 5.596781  | 3.032144  |
| H | 2.607921  | 5.947086  | 2.027118  |
| C | 4.016481  | 5.875002  | 5.120637  |
| H | 4.721823  | 6.423944  | 5.737925  |
| C | -0.275838 | -4.432086 | -2.229650 |
| H | -1.232524 | -4.117900 | -1.819890 |
| C | 3.739781  | 6.301548  | 3.820535  |
| H | 4.226112  | 7.187735  | 3.422433  |
| C | 3.370153  | 4.746206  | 5.626598  |
| H | 3.567236  | 4.415008  | 6.642409  |
| C | 1.895590  | -3.896286 | -3.114751 |
| H | 2.644531  | -3.165266 | -3.406845 |
| C | 2.149260  | -5.253330 | -3.321006 |
| H | 3.094021  | -5.565337 | -3.757467 |
| C | 1.188643  | -6.205627 | -2.977110 |
| H | 1.382908  | -7.261872 | -3.139878 |
| C | -0.028500 | -5.790111 | -2.434388 |
| H | -0.788768 | -6.522138 | -2.176646 |

(13) X = Y = NH(Me), isomer P

|    |           |          |          |
|----|-----------|----------|----------|
| Zr | -1.292899 | 1.419918 | 0.045700 |
| N  | 0.198869  | 1.242397 | 2.255896 |

|   |           |           |           |
|---|-----------|-----------|-----------|
| C | 1.306670  | 2.713967  | 4.067169  |
| C | 2.665350  | 3.014569  | 3.888445  |
| H | 3.050283  | 3.172282  | 2.884729  |
| C | 1.464739  | 0.784347  | 1.637124  |
| H | 2.274894  | 0.721782  | 2.380066  |
| H | 1.284174  | -0.223055 | 1.258596  |
| C | -0.849881 | -1.709975 | -0.452782 |
| H | -1.626363 | -2.417162 | -0.805286 |
| H | -0.122228 | -2.341130 | 0.090536  |
| N | -1.420607 | -0.675817 | 0.385733  |
| C | -4.027432 | 2.352757  | 1.466984  |
| H | -4.312539 | 3.366597  | 1.792958  |
| C | 0.359172  | 2.596474  | 2.881625  |
| H | 0.667071  | 3.274818  | 2.082938  |
| H | -0.635395 | 2.920367  | 3.198038  |
| H | -4.610617 | 1.643360  | 2.077813  |
| H | -4.363267 | 2.239667  | 0.432304  |
| H | -2.254669 | 4.638560  | -1.920643 |
| H | -2.697039 | 4.268671  | -0.249752 |
| N | -0.837959 | 0.049166  | -2.213082 |
| C | -1.818247 | -1.175488 | 1.700077  |
| H | -2.176785 | -2.216243 | 1.620650  |
| H | -2.662232 | -0.583521 | 2.072992  |
| C | -2.803145 | 3.925139  | -1.282958 |
| H | -3.869922 | 4.013375  | -1.546504 |
| C | -0.021426 | 0.780420  | -3.219852 |
| H | -0.671573 | 1.557860  | -3.638925 |
| H | 0.236589  | 0.102327  | -4.047071 |
| N | 0.712052  | 2.021815  | -0.338637 |
| C | 0.832976  | 2.558795  | 5.378894  |
| H | -0.221838 | 2.353615  | 5.544339  |
| C | -2.044583 | -0.806540 | -5.324637 |
| H | -2.070246 | 0.270353  | -5.471950 |
| C | -2.137509 | -0.392325 | -2.818094 |
| H | -2.675392 | 0.513234  | -3.109975 |
| H | -2.716078 | -0.853456 | -2.014639 |
| C | -2.029639 | -3.566709 | -4.971058 |
| H | -2.035922 | -4.643344 | -4.825530 |
| C | 3.041286  | 2.961137  | 6.277932  |
| H | 3.709257  | 3.057410  | 7.129090  |
| C | -2.072590 | -1.323578 | -4.020305 |
| N | -2.589754 | 2.112863  | 1.545013  |
| H | -2.286136 | 2.244484  | 2.504462  |
| C | -0.307653 | 0.265254  | 3.258205  |
| H | -1.199355 | 0.717595  | 3.708615  |
| H | 0.430912  | 0.150090  | 4.065777  |
| C | 1.078317  | 2.544981  | -1.653098 |
| H | 2.012633  | 3.128650  | -1.585005 |
| H | 0.302910  | 3.239072  | -1.997573 |
| C | -0.097922 | -1.095695 | -1.634178 |
| H | 0.853553  | -0.704441 | -1.271016 |
| H | 0.123669  | -1.858910 | -2.396409 |
| N | -2.297672 | 2.561016  | -1.401459 |
| H | -2.418170 | 2.245938  | -2.358536 |
| C | 3.526387  | 3.133663  | 4.980712  |
| H | 4.574264  | 3.369891  | 4.817807  |
| C | -1.986508 | -3.035079 | -6.260769 |
| H | -1.954414 | -3.694477 | -7.123393 |
| C | -0.690116 | -1.133595 | 2.749809  |
| H | 0.190885  | -1.665817 | 2.371047  |
| H | -1.009989 | -1.620587 | 3.640911  |
| C | 1.688739  | 2.677018  | 6.474581  |
| H | 1.297731  | 2.555140  | 7.480859  |
| C | -1.998482 | -1.650078 | -6.435062 |
| H | -1.979994 | -1.226092 | -7.435166 |
| C | 1.868162  | 1.676946  | 0.462743  |
| H | 2.396739  | 2.582438  | 0.820437  |
| H | 2.629313  | 1.117409  | -0.112369 |
| C | 1.267959  | 1.455901  | -2.727618 |
| H | 1.992291  | 0.709984  | -2.378885 |
| H | 1.721373  | 1.909716  | -3.620553 |
| C | -2.075828 | -2.717767 | -3.863915 |
| H | -2.130004 | -3.143244 | -2.865724 |

(13) X = Y = NH(Me), isomer T

|    |           |           |           |
|----|-----------|-----------|-----------|
| Zr | -1.013876 | 1.255424  | -1.009008 |
| N  | 0.828143  | 2.687807  | 0.732473  |
| N  | 0.864295  | 1.553034  | -1.939567 |
| N  | -0.924073 | -0.030630 | 0.672990  |
| N  | -0.239408 | -1.490646 | -1.760620 |
| C  | 1.395787  | 1.607206  | 1.572595  |
| H  | 2.289185  | 1.962198  | 2.112254  |
| H  | 1.732050  | 0.826245  | 0.887946  |
| C  | -3.200460 | 1.577568  | -3.366683 |



Supplementary Material (ESI) for Dalton Transactions  
This journal is © The Royal Society of Chemistry 2009

|   |           |           |           |
|---|-----------|-----------|-----------|
| C | 0.301562  | 3.681613  | 1.684326  |
| H | -0.403920 | 3.260179  | 2.402852  |
| H | -0.293640 | 4.260683  | 0.977175  |
| C | 1.470399  | -1.376086 | -1.804762 |
| H | 1.877451  | -2.395928 | -1.889684 |
| H | 1.830777  | -0.974860 | -0.854174 |
| C | 1.280808  | 4.590477  | 2.412408  |
| C | -0.482213 | -2.156074 | -0.547094 |
| H | -0.050651 | -3.168176 | -0.517962 |
| H | -1.565719 | -2.264624 | -0.657934 |
| C | -0.417637 | -3.441426 | -3.237667 |
| C | 0.522761  | 0.848117  | 2.747709  |
| H | 0.339386  | 1.475169  | 3.628539  |
| H | 1.012762  | -0.057308 | 3.125981  |
| C | -0.634302 | -1.959260 | -2.970328 |
| H | -0.264636 | -1.378570 | -3.817723 |
| H | -1.700968 | -1.745235 | -2.896197 |
| C | 2.022214  | -0.502704 | -2.942672 |
| H | 1.981351  | -1.029124 | -3.903634 |
| H | 3.087996  | -0.344030 | -2.738583 |
| C | -0.212983 | -1.449346 | 0.777288  |
| H | -0.707681 | -2.045449 | 1.563198  |
| H | 0.864153  | -1.487390 | 1.019140  |
| C | -2.831738 | 3.406487  | -0.176524 |
| C | 1.725554  | 4.299859  | 3.711001  |
| H | 1.354083  | 3.414528  | 4.219793  |
| C | 1.744832  | 5.767485  | 1.805741  |
| H | 1.389436  | 6.030202  | 0.812516  |
| C | 3.084458  | 6.300716  | 3.747121  |
| H | 3.777754  | 6.959791  | 4.261710  |
| C | -1.375727 | -4.382129 | -2.830487 |
| H | -2.278068 | -4.039663 | -2.330200 |
| C | 2.639318  | 6.613994  | 2.461614  |
| H | 2.980932  | 7.521962  | 1.972571  |
| F | -3.186694 | 2.323349  | 0.601503  |
| C | 2.620771  | 5.142298  | 4.372372  |
| H | 2.948200  | 4.898170  | 5.379131  |
| F | -4.037729 | 1.678952  | -3.125362 |
| F | -2.791242 | 4.480550  | 0.680368  |
| C | 0.717919  | -3.909615 | -3.916169 |
| H | 1.459284  | -3.201217 | -4.275431 |
| C | 0.902098  | -5.271835 | -4.158948 |
| H | 1.787878  | -5.610512 | -4.689088 |
| F | -3.225001 | -0.087214 | -4.067090 |
| F | -1.916536 | 1.631125  | -3.678634 |
| F | -3.893280 | 3.659978  | -0.986457 |
| C | -0.054130 | -6.194885 | -3.732876 |
| H | 0.085430  | -7.254847 | -3.924825 |
| C | -1.198047 | -5.744943 | -3.071245 |
| H | -1.956312 | -6.453505 | -2.749952 |
| H | -3.259448 | -0.134874 | -1.459147 |
| H | -1.353364 | 3.886832  | -1.409133 |
